# Supplementary material for: Association of Childhood Fat Mass and Weight With Adult-Onset Type 2 Diabetes in Denmark
Source: PubMed Central journal article supplement (PMC8087954; doi:10.1001/jamanetworkopen.2021.8524), 2021-04-30

## Supplementary Online Content

Hudda MT, Aarestrup J, Owen CG, et al. Association of childhood fat mass and weight with adult-onset type 2 diabetes in Denmark. *JAMA Netw Open*. 2021;4(4):e218524. doi:10.1001/jamanetworkopen.2021.8524

**eTable 1.** Mean (SD) of Childhood Weight, Fat Mass, Fat-Free Mass, and Height at 10 and 13 Years of Age, by Birth-Cohort Group and Overall

**eTable 2.** Correlation Coefficients Between Each of the Childhood Body Composition Markers and Childhood Height, by Sex and Age

**eTable 3.** Unadjusted Hazard Ratios (95% CI) for the Crude Associations Between Fat Mass and Weight (per-Kilogram Increase) at Age 10 Years and Risk of Type 2 Diabetes (T2D) Between 30 and 70 Years, by Sex, Birth-Cohort Group and Overall

**eTable 4.** Unadjusted Hazard Ratios (95% CI) for the Crude Associations Between Fat Mass and Weight (per-Kilogram Increase) at Age 13 Years and Risk of Type 2 Diabetes (T2D) Between 30 and 70 Years, by Sex, Birth-Cohort Group and Overall

**eTable 5.** Adjusted Hazard Ratios (95% CI) for Associations Between Fat Mass and Weight (per-SD Increase in Exposure) at Age 10 Years and Risk of Type 2 Diabetes Between 30 and 70 Years, by Sex, Birth-Cohort Group and Overall

**eTable 6.** Adjusted Hazard Ratios (95% CI) for Associations Between Fat Mass and Weight (per-SD Increase in Exposure) at Age 13 Years and Risk of Type 2 Diabetes Between 30 and 70 Years, by Sex, Birth-Cohort Group and Overall

**eTable 7.** Adjusted Hazard Ratios (95% CI), Censored at 60 Years of Age, for Associations Between Fat Mass and Weight (per-Kilogram Increase) at Age 10 Years and Risk of Type 2 Diabetes (T2D) Between 30 and 60 Years, by Sex, Birth-Cohort Group and Overall

**eTable 8.** Adjusted Hazard Ratios (95% CI), Censored at 60 Years of Age, for Associations Between Fat Mass and Weight (per-Kilogram Increase) at Age 13 Years and Risk of Type 2 Diabetes (T2D) Between 30 and 60 Years, by Sex, Birth-Cohort Group and Overall

**eFigure.** Flowchart of Available Participants and Exclusions Made in This Study

This supplementary material has been provided by the authors to give readers additional information about their work.

**eTable 1.** Mean (SD) of Childhood Weight, Fat Mass, Fat-Free Mass, and Height at 10 and 13 Years of Age, by Birth-Cohort Group and Overall

|              |                    | Childhood Age |             |               |                    |             |          |             |               |                    |             |
|--------------|--------------------|---------------|-------------|---------------|--------------------|-------------|----------|-------------|---------------|--------------------|-------------|
|              |                    | 10 Years      |             |               |                    |             | 13 Years |             |               |                    |             |
|              | Birth-cohort group | N             | Weight (kg) | Fat Mass (kg) | Fat-free Mass (kg) | Height (m)  | N        | Weight (kg) | Fat Mass (kg) | Fat-free Mass (kg) | Height (m)  |
| <b>Boys</b>  | 1930-39            | 29,917        | 30.4 (4.0)  | 6.6 (1.8)     | 23.8 (2.5)         | 1.36 (0.06) | 28,755   | 40.8 (6.5)  | 8.3 (2.9)     | 32.5 (4.3)         | 1.51 (0.07) |
|              | 1940-49            | 43,819        | 31.9 (4.5)  | 7.1 (2.2)     | 24.7 (2.6)         | 1.38 (0.06) | 43,548   | 43.0 (7.3)  | 8.9 (3.3)     | 34.1 (4.7)         | 1.53 (0.08) |
|              | 1950-59            | 29,143        | 32.0 (4.9)  | 7.1 (2.4)     | 24.9 (2.8)         | 1.39 (0.06) | 28,935   | 43.1 (7.9)  | 8.7 (3.7)     | 34.4 (5.0)         | 1.54 (0.08) |
|              | 1960-69            | 19,367        | 32.5 (5.1)  | 7.2 (2.5)     | 25.3 (2.9)         | 1.40 (0.06) | 19,304   | 44.3 (8.2)  | 9.0 (3.7)     | 35.3 (5.3)         | 1.56 (0.08) |
|              | 1970-85            | 13,694        | 33.9 (6.2)  | 8.0 (3.3)     | 25.9 (3.2)         | 1.40 (0.06) | 10,483   | 47.2 (10.2) | 10.3 (5.1)    | 36.8 (6.0)         | 1.57 (0.08) |
|              | <i>Overall</i>     | 135,940       | 31.9 (4.9)  | 7.1 (2.4)     | 24.7 (2.8)         | 1.38 (0.06) | 131,025  | 43.1 (7.9)  | 8.9 (3.6)     | 34.2 (5.0)         | 1.54 (0.08) |
| <b>Girls</b> | 1930-39            | 29,186        | 30.2 (4.4)  | 7.8 (2.2)     | 22.4 (2.5)         | 1.35 (0.06) | 29,070   | 43.2 (7.2)  | 11.0 (3.6)    | 32.3 (4.1)         | 1.52 (0.07) |
|              | 1940-49            | 43,383        | 31.5 (4.9)  | 8.2 (2.6)     | 23.2 (2.7)         | 1.37 (0.06) | 43,189   | 44.9 (7.6)  | 11.3 (4.0)    | 33.5 (4.3)         | 1.55 (0.07) |
|              | 1950-59            | 28,495        | 31.6 (5.3)  | 8.2 (2.8)     | 23.4 (2.8)         | 1.38 (0.06) | 28,421   | 45.3 (8.1)  | 11.2 (4.3)    | 34.0 (4.5)         | 1.56 (0.07) |
|              | 1960-69            | 19,292        | 32.2 (5.5)  | 8.3 (2.9)     | 23.8 (2.9)         | 1.39 (0.06) | 19,267   | 46.3 (8.4)  | 11.5 (4.5)    | 34.7 (4.6)         | 1.57 (0.07) |
|              | 1970-85            | 13,617        | 33.9 (6.6)  | 9.2 (3.6)     | 24.6 (3.3)         | 1.40 (0.07) | 10,220   | 48.8 (9.8)  | 12.9 (5.5)    | 35.9 (5.1)         | 1.58 (0.07) |
|              | <i>Overall</i>     | 133,973       | 31.6 (5.3)  | 8.2 (2.7)     | 23.3 (2.8)         | 1.37 (0.06) | 130,167  | 45.1 (8.1)  | 11.4 (4.2)    | 33.7 (4.5)         | 1.55 (0.07) |

**eTable 2.** Correlation Coefficients Between Each of the Childhood Body Composition Markers and Childhood Height, by Sex and Age

|              |               | 10 Years |          |               |        | 13 Years |          |               |        |
|--------------|---------------|----------|----------|---------------|--------|----------|----------|---------------|--------|
|              |               | Height   | Fat Mass | Fat-free Mass | Weight | Height   | Fat Mass | Fat-free Mass | Weight |
| <b>Boys</b>  | Height        |          |          |               |        |          |          |               |        |
|              | Fat Mass      | 0.45     |          |               |        | 0.38     |          |               |        |
|              | Fat-free Mass | 0.92     | 0.76     |               |        | 0.94     | 0.66     |               |        |
|              | Weight        | 0.75     | 0.93     | 0.95          |        | 0.77     | 0.88     | 0.94          |        |
|              |               |          |          |               |        |          |          |               |        |
| <b>Girls</b> | Height        |          |          |               |        |          |          |               |        |
|              | Fat Mass      | 0.48     |          |               |        | 0.35     |          |               |        |
|              | Fat-free Mass | 0.91     | 0.80     |               |        | 0.91     | 0.69     |               |        |
|              | Weight        | 0.73     | 0.95     | 0.95          |        | 0.70     | 0.91     | 0.93          |        |

**eTable 3.** Unadjusted Hazard Ratios (95% CI) for the Crude Associations Between Fat Mass and Weight (per-Kilogram Increase) at Age 10 Years and Risk of Type 2 Diabetes (T2D) Between 30 and 70 Years, by Sex, Birth-Cohort Group and Overall

|                   |                  | Birth Cohort Group    |                       |                       |                      |                      |                    |
|-------------------|------------------|-----------------------|-----------------------|-----------------------|----------------------|----------------------|--------------------|
| Adult Age (years) | Adiposity marker | 1930-39 (29917, 4588) | 1940-49 (43819, 5554) | 1950-59 (29143, 2317) | 1960-69 (19367, 684) | 1970-85 (13694, 119) | Pooled             |
| <b>Boys</b>       |                  |                       |                       |                       |                      |                      |                    |
| 30                | Fat Mass         | 1.12 (1.07 - 1.19)    | 1.17 (1.13 - 1.21)    | 1.17 (1.13 - 1.22)    | 1.20 (1.14 - 1.27)   | 1.18 (1.11 - 1.26)   | 1.17 (1.15 - 1.19) |
|                   | Weight           | 1.04 (1.01 - 1.07)    | 1.07 (1.05 - 1.09)    | 1.07 (1.05 - 1.10)    | 1.10 (1.07 - 1.14)   | 1.10 (1.06 - 1.15)   | 1.07 (1.05 - 1.09) |
| 40                | Fat Mass         | 1.10 (1.06 - 1.14)    | 1.13 (1.11 - 1.16)    | 1.14 (1.11 - 1.17)    | 1.16 (1.13 - 1.19)   | 1.17 (1.12 - 1.22)   | 1.14 (1.12 - 1.16) |
|                   | Weight           | 1.03 (1.01 - 1.05)    | 1.05 (1.04 - 1.07)    | 1.06 (1.04 - 1.07)    | 1.08 (1.06 - 1.09)   | 1.09 (1.06 - 1.12)   | 1.06 (1.04 - 1.08) |
| 50                | Fat Mass         | 1.08 (1.05 - 1.10)    | 1.10 (1.08 - 1.11)    | 1.11 (1.09 - 1.12)    | 1.12 (1.09 - 1.16)   |                      | 1.10 (1.09 - 1.11) |
|                   | Weight           | 1.02 (1.01 - 1.04)    | 1.04 (1.03 - 1.04)    | 1.04 (1.04 - 1.05)    | 1.06 (1.04 - 1.07)   |                      | 1.04 (1.03 - 1.05) |
| 60                | Fat Mass         | 1.05 (1.03 - 1.07)    | 1.06 (1.05 - 1.07)    | 1.08 (1.06 - 1.10)    |                      |                      | 1.06 (1.05 - 1.07) |
|                   | Weight           | 1.02 (1.01 - 1.02)    | 1.02 (1.01 - 1.03)    | 1.03 (1.02 - 1.04)    |                      |                      | 1.02 (1.01 - 1.03) |
| 70                | Fat Mass         | 1.03 (1.01 - 1.05)    | 1.03 (1.01 - 1.05)    |                       |                      |                      | 1.03 (1.01 - 1.04) |
|                   | Weight           | 1.01 (1.00 - 1.02)    | 1.00 (1.00 - 1.01)    |                       |                      |                      | 1.01 (1.00 - 1.01) |
| <b>Girls</b>      |                  |                       |                       |                       |                      |                      |                    |
|                   |                  | 1930-39 (29186, 3223) | 1940-49 (43383, 3375) | 1950-59 (28495, 1440) | 1960-69 (19292, 492) | 1970-85 (13617, 104) | Pooled             |
| 30                | Fat Mass         | 1.19 (1.13 - 1.25)    | 1.16 (1.13 - 1.20)    | 1.17 (1.13 - 1.23)    | 1.22 (1.16 - 1.28)   | 1.23 (1.16 - 1.30)   | 1.19 (1.16 - 1.21) |
|                   | Weight           | 1.08 (1.05 - 1.11)    | 1.07 (1.05 - 1.10)    | 1.09 (1.06 - 1.11)    | 1.11 (1.08 - 1.15)   | 1.12 (1.08 - 1.16)   | 1.09 (1.07 - 1.10) |
| 40                | Fat Mass         | 1.15 (1.11 - 1.20)    | 1.14 (1.11 - 1.17)    | 1.14 (1.11 - 1.17)    | 1.19 (1.16 - 1.22)   | 1.21 (1.15 - 1.27)   | 1.16 (1.14 - 1.19) |
|                   | Weight           | 1.06 (1.04 - 1.08)    | 1.06 (1.05 - 1.08)    | 1.07 (1.05 - 1.08)    | 1.09 (1.08 - 1.11)   | 1.10 (1.07 - 1.13)   | 1.08 (1.06 - 1.09) |
| 50                | Fat Mass         | 1.11 (1.09 - 1.14)    | 1.11 (1.10 - 1.13)    | 1.11 (1.10 - 1.13)    | 1.16 (1.13 - 1.19)   |                      | 1.12 (1.10 - 1.14) |
|                   | Weight           | 1.05 (1.03 - 1.06)    | 1.05 (1.04 - 1.06)    | 1.05 (1.04 - 1.06)    | 1.08 (1.06 - 1.10)   |                      | 1.05 (1.04 - 1.06) |
| 60                | Fat Mass         | 1.08 (1.06 - 1.10)    | 1.09 (1.08 - 1.10)    | 1.08 (1.06 - 1.11)    |                      |                      | 1.09 (1.08 - 1.10) |
|                   | Weight           | 1.03 (1.02 - 1.04)    | 1.04 (1.03 - 1.04)    | 1.03 (1.02 - 1.05)    |                      |                      | 1.03 (1.03 - 1.04) |
| 70                | Fat Mass         | 1.04 (1.03 - 1.06)    | 1.07 (1.05 - 1.09)    |                       |                      |                      | 1.06 (1.03 - 1.08) |
|                   | Weight           | 1.02 (1.01 - 1.02)    | 1.03 (1.02 - 1.04)    |                       |                      |                      | 1.02 (1.01 - 1.03) |

FOOTNOTE: Hazard Ratios + 95% CIs estimated from Cox proportional hazards models fitted within each of the five birth cohort groups. The resulting estimates were averaged using a random-effects meta-analysis approach to provide an overall estimate of the effect of fat mass and weight on T2D risk in adulthood. Birth cohort groups from 1950-59, 1960-69 and 1970-85 contain some empty cells as individuals within these groups were not yet old enough to provide estimates, without extrapolation, at these adult ages.

**eTable 4.** Unadjusted Hazard Ratios (95% CI) for the Crude Associations Between Fat Mass and Weight (per-Kilogram Increase) at Age 13 Years and Risk of Type 2 Diabetes (T2D) Between 30 and 70 Years, by Sex, Birth-Cohort Group and Overall

|                   |                  | Birth Cohort Group (N, cases) |                       |                       |                      |                     |                    |
|-------------------|------------------|-------------------------------|-----------------------|-----------------------|----------------------|---------------------|--------------------|
| Adult Age (years) | Adiposity marker | 1930-39 (28755, 4410)         | 1940-49 (43548, 5508) | 1950-59 (28935, 2299) | 1960-69 (19304, 686) | 1970-85 (10483, 97) | <i>Pooled</i>      |
| <b>Boys</b>       |                  |                               |                       |                       |                      |                     |                    |
| 30                | Fat Mass         | 1.13 (1.09 - 1.16)            | 1.13 (1.10 - 1.15)    | 1.14 (1.11 - 1.17)    | 1.14 (1.10 - 1.18)   | 1.08 (1.03 - 1.14)  | 1.13 (1.11 - 1.14) |
|                   | Weight           | 1.04 (1.02 - 1.06)            | 1.05 (1.04 - 1.06)    | 1.06 (1.04 - 1.07)    | 1.06 (1.04 - 1.09)   | 1.04 (1.01 - 1.07)  | 1.05 (1.04 - 1.06) |
| 40                | Fat Mass         | 1.11 (1.08 - 1.13)            | 1.11 (1.09 - 1.12)    | 1.12 (1.10 - 1.13)    | 1.12 (1.10 - 1.14)   | 1.12 (1.08 - 1.16)  | 1.11 (1.10 - 1.12) |
|                   | Weight           | 1.03 (1.02 - 1.05)            | 1.04 (1.03 - 1.05)    | 1.05 (1.04 - 1.06)    | 1.05 (1.05 - 1.06)   | 1.06 (1.04 - 1.08)  | 1.05 (1.04 - 1.05) |
| 50                | Fat Mass         | 1.09 (1.07 - 1.10)            | 1.09 (1.08 - 1.10)    | 1.10 (1.09 - 1.11)    | 1.10 (1.08 - 1.13)   |                     | 1.09 (1.08 - 1.10) |
|                   | Weight           | 1.03 (1.02 - 1.04)            | 1.03 (1.03 - 1.04)    | 1.04 (1.03 - 1.04)    | 1.05 (1.03 - 1.06)   |                     | 1.04 (1.03 - 1.04) |
| 60                | Fat Mass         | 1.07 (1.06 - 1.08)            | 1.07 (1.06 - 1.07)    | 1.08 (1.06 - 1.09)    |                      |                     | 1.07 (1.06 - 1.07) |
|                   | Weight           | 1.02 (1.02 - 1.03)            | 1.02 (1.02 - 1.03)    | 1.03 (1.02 - 1.04)    |                      |                     | 1.02 (1.02 - 1.03) |
| 70                | Fat Mass         | 1.05 (1.04 - 1.06)            | 1.05 (1.04 - 1.06)    |                       |                      |                     | 1.05 (1.04 - 1.06) |
|                   | Weight           | 1.02 (1.01 - 1.02)            | 1.01 (1.01 - 1.02)    |                       |                      |                     | 1.02 (1.01 - 1.02) |
| <b>Girls</b>      |                  |                               |                       |                       |                      |                     |                    |
| 30                | Fat Mass         | 1.15 (1.12 - 1.19)            | 1.11 (1.08 - 1.13)    | 1.14 (1.11 - 1.17)    | 1.16 (1.13 - 1.20)   | 1.11 (1.05 - 1.17)  | 1.14 (1.11 - 1.16) |
|                   | Weight           | 1.06 (1.04 - 1.08)            | 1.05 (1.03 - 1.06)    | 1.07 (1.06 - 1.09)    | 1.09 (1.07 - 1.11)   | 1.05 (1.01 - 1.09)  | 1.06 (1.05 - 1.08) |
| 40                | Fat Mass         | 1.12 (1.10 - 1.15)            | 1.10 (1.08 - 1.11)    | 1.12 (1.10 - 1.14)    | 1.13 (1.12 - 1.15)   | 1.15 (1.11 - 1.19)  | 1.12 (1.11 - 1.14) |
|                   | Weight           | 1.05 (1.04 - 1.06)            | 1.04 (1.03 - 1.05)    | 1.06 (1.05 - 1.07)    | 1.07 (1.06 - 1.08)   | 1.07 (1.05 - 1.10)  | 1.06 (1.05 - 1.07) |
| 50                | Fat Mass         | 1.10 (1.08 - 1.12)            | 1.09 (1.08 - 1.10)    | 1.10 (1.09 - 1.11)    | 1.10 (1.08 - 1.12)   |                     | 1.09 (1.09 - 1.10) |
|                   | Weight           | 1.04 (1.03 - 1.05)            | 1.04 (1.03 - 1.04)    | 1.04 (1.04 - 1.05)    | 1.05 (1.04 - 1.06)   |                     | 1.04 (1.04 - 1.05) |
| 60                | Fat Mass         | 1.07 (1.06 - 1.08)            | 1.08 (1.07 - 1.09)    | 1.07 (1.06 - 1.09)    |                      |                     | 1.08 (1.07 - 1.08) |
|                   | Weight           | 1.03 (1.02 - 1.04)            | 1.03 (1.03 - 1.04)    | 1.03 (1.02 - 1.04)    |                      |                     | 1.03 (1.03 - 1.04) |
| 70                | Fat Mass         | 1.05 (1.04 - 1.06)            | 1.07 (1.06 - 1.08)    |                       |                      |                     | 1.06 (1.04 - 1.08) |
|                   | Weight           | 1.02 (1.01 - 1.02)            | 1.03 (1.02 - 1.04)    |                       |                      |                     | 1.02 (1.01 - 1.04) |

FOOTNOTE: Hazard Ratios + 95% CIs estimated from Cox proportional hazards models fitted within each of the five birth cohort groups. The resulting estimates were averaged using a random-effects meta-analysis approach to provide an overall estimate of the effect of fat mass and weight on T2D risk in adulthood. Birth cohort groups from 1950-59, 1960-69 and 1970-85 contain some empty cells as individuals within these groups were not yet old enough to provide estimates, without extrapolation, at these adult ages

**eTable 5.** Adjusted Hazard Ratios (95% CI) for Associations Between Fat Mass and Weight (per-SD Increase in Exposure) at Age 10 Years and Risk of Type 2 Diabetes Between 30 and 70 Years, by Sex, Birth-Cohort Group and Overall

| Adult Age (years) | Adiposity marker | Birth Cohort Group           |                              |                              |                             |                             |
|-------------------|------------------|------------------------------|------------------------------|------------------------------|-----------------------------|-----------------------------|
|                   |                  | 1930-39 (29917, 4588)        | 1940-49 (43819, 5554)        | 1950-59 (29143, 2317)        | 1960-69 (19367, 684)        | 1970-85 (13694, 119)        |
| <b>Boys</b>       |                  |                              |                              |                              |                             |                             |
| 30                | Fat Mass         | 1.26 (1.14 - 1.38)           | 1.46 (1.36 - 1.56)           | 1.54 (1.40 - 1.69)           | 1.62 (1.43 - 1.85)          | 1.81 (1.48 - 2.20)          |
|                   | Weight           | 1.25 (1.12 - 1.39)           | 1.55 (1.44 - 1.68)           | 1.69 (1.52 - 1.88)           | 1.89 (1.62 - 2.21)          | 2.22 (1.75 - 2.82)          |
| 40                | Fat Mass         | 1.21 (1.12 - 1.30)           | 1.36 (1.30 - 1.43)           | 1.44 (1.36 - 1.53)           | 1.50 (1.40 - 1.59)          | 1.79 (1.56 - 2.05)          |
|                   | Weight           | 1.22 (1.12 - 1.32)           | 1.46 (1.37 - 1.54)           | 1.59 (1.48 - 1.71)           | 1.73 (1.59 - 1.89)          | 2.18 (1.82 - 2.61)          |
| 50                | Fat Mass         | 1.16 (1.11 - 1.22)           | 1.27 (1.23 - 1.31)           | 1.35 (1.30 - 1.40)           | 1.38 (1.27 - 1.49)          |                             |
|                   | Weight           | 1.18 (1.11 - 1.26)           | 1.36 (1.31 - 1.42)           | 1.50 (1.43 - 1.58)           | 1.58 (1.43 - 1.75)          |                             |
| 60                | Fat Mass         | 1.12 (1.08 - 1.15)           | 1.19 (1.16 - 1.22)           | 1.27 (1.20 - 1.34)           |                             |                             |
|                   | Weight           | 1.15 (1.10 - 1.20)           | 1.28 (1.23 - 1.33)           | 1.42 (1.33 - 1.51)           |                             |                             |
| 70                | Fat Mass         | 1.07 (1.04 - 1.11)           | 1.11 (1.07 - 1.16)           |                              |                             |                             |
|                   | Weight           | 1.12 (1.07 - 1.17)           | 1.20 (1.14 - 1.26)           |                              |                             |                             |
| <b>Girls</b>      |                  |                              |                              |                              |                             |                             |
|                   |                  | <b>1930-39 (29186, 3223)</b> | <b>1940-49 (43383, 3375)</b> | <b>1950-59 (28495, 1440)</b> | <b>1960-69 (19292, 492)</b> | <b>1970-85 (13617, 104)</b> |
| 30                | Fat Mass         | 1.50 (1.35 - 1.68)           | 1.55 (1.42 - 1.69)           | 1.67 (1.49 - 1.87)           | 1.87 (1.62 - 2.15)          | 2.55 (2.06 - 3.16)          |
|                   | Weight           | 1.54 (1.36 - 1.75)           | 1.69 (1.53 - 1.85)           | 1.89 (1.66 - 2.15)           | 2.22 (1.88 - 2.64)          | 3.35 (2.59 - 4.34)          |
| 40                | Fat Mass         | 1.41 (1.30 - 1.53)           | 1.47 (1.39 - 1.56)           | 1.55 (1.44 - 1.67)           | 1.76 (1.64 - 1.90)          | 2.47 (2.05 - 2.98)          |
|                   | Weight           | 1.45 (1.32 - 1.60)           | 1.60 (1.49 - 1.72)           | 1.75 (1.60 - 1.90)           | 2.10 (1.90 - 2.31)          | 3.27 (2.59 - 4.13)          |
| 50                | Fat Mass         | 1.32 (1.24 - 1.39)           | 1.40 (1.34 - 1.45)           | 1.45 (1.38 - 1.52)           | 1.66 (1.52 - 1.82)          |                             |
|                   | Weight           | 1.37 (1.28 - 1.47)           | 1.52 (1.45 - 1.60)           | 1.61 (1.52 - 1.72)           | 1.98 (1.77 - 2.22)          |                             |
| 60                | Fat Mass         | 1.23 (1.18 - 1.28)           | 1.33 (1.28 - 1.37)           | 1.35 (1.26 - 1.44)           |                             |                             |
|                   | Weight           | 1.29 (1.23 - 1.36)           | 1.45 (1.39 - 1.51)           | 1.49 (1.38 - 1.62)           |                             |                             |
| 70                | Fat Mass         | 1.15 (1.11 - 1.20)           | 1.26 (1.20 - 1.32)           |                              |                             |                             |
|                   | Weight           | 1.22 (1.16 - 1.28)           | 1.38 (1.30 - 1.46)           |                              |                             |                             |

FOOTNOTE: Hazard Ratios + 95% CIs (per SD increase in adiposity marker) estimated from Cox proportional hazards models fitted within each of the five birth-cohort groups, adjusting for childhood height at age 10 years. SDs of adiposity markers at age 10 years were sex- and birth-cohort specific and can be found in Supplementary Table 1. Birth-cohort groups from 1950-59, 1960-69 and 1970-85 contain some empty cells as individuals within these groups were not yet old enough to provide estimates, without extrapolation, at these adult age

**eTable 6.** Adjusted Hazard Ratios (95% CI) for Associations Between Fat Mass and Weight (per-SD Increase in Exposure) at Age 13 Years and Risk of Type 2 Diabetes Between 30 and 70 Years, by Sex, Birth-Cohort Group and Overall

|                   |                  | Birth-cohort group (N, cases) |                       |                       |                      |                     |
|-------------------|------------------|-------------------------------|-----------------------|-----------------------|----------------------|---------------------|
| Adult Age (years) | Adiposity marker | 1930-39 (28755, 4410)         | 1940-49 (43548, 5508) | 1950-59 (28935, 2299) | 1960-69 (19304, 686) | 1970-85 (10483, 97) |
| <b>Boys</b>       |                  |                               |                       |                       |                      |                     |
| 30                | Fat Mass         | 1.43 (1.30 - 1.56)            | 1.52 (1.42 - 1.62)    | 1.63 (1.49 - 1.79)    | 1.64 (1.43 - 1.87)   | 1.53 (1.19 - 1.97)  |
|                   | Weight           | 1.48 (1.34 - 1.64)            | 1.70 (1.58 - 1.84)    | 1.86 (1.67 - 2.07)    | 2.00 (1.70 - 2.35)   | 1.95 (1.45 - 2.60)  |
| 40                | Fat Mass         | 1.36 (1.27 - 1.45)            | 1.43 (1.37 - 1.50)    | 1.53 (1.45 - 1.62)    | 1.54 (1.45 - 1.64)   | 1.82 (1.54 - 2.16)  |
|                   | Weight           | 1.43 (1.32 - 1.55)            | 1.61 (1.52 - 1.71)    | 1.77 (1.64 - 1.89)    | 1.88 (1.72 - 2.06)   | 2.21 (1.77 - 2.77)  |
| 50                | Fat Mass         | 1.29 (1.23 - 1.35)            | 1.35 (1.31 - 1.39)    | 1.43 (1.39 - 1.48)    | 1.46 (1.35 - 1.57)   |                     |
|                   | Weight           | 1.38 (1.30 - 1.47)            | 1.52 (1.46 - 1.59)    | 1.68 (1.60 - 1.76)    | 1.77 (1.60 - 1.96)   |                     |
| 60                | Fat Mass         | 1.22 (1.19 - 1.26)            | 1.27 (1.24 - 1.31)    | 1.34 (1.28 - 1.41)    |                      |                     |
|                   | Weight           | 1.34 (1.28 - 1.40)            | 1.44 (1.39 - 1.50)    | 1.59 (1.50 - 1.70)    |                      |                     |
| 70                | Fat Mass         | 1.16 (1.13 - 1.20)            | 1.20 (1.16 - 1.25)    |                       |                      |                     |
|                   | Weight           | 1.29 (1.23 - 1.35)            | 1.36 (1.30 - 1.43)    |                       |                      |                     |
| <b>Girls</b>      |                  |                               |                       |                       |                      |                     |
|                   |                  | 1930-39 (29070, 3177)         | 1940-49 (43189, 3358) | 1950-59 (28421, 1434) | 1960-69 (19267, 496) | 1970-85 (10220, 65) |
| 30                | Fat Mass         | 1.70 (1.52 - 1.90)            | 1.54 (1.41 - 1.68)    | 1.83 (1.64 - 2.04)    | 2.02 (1.77 - 2.30)   | 1.97 (1.46 - 2.66)  |
|                   | Weight           | 1.74 (1.53 - 1.98)            | 1.67 (1.52 - 1.84)    | 2.09 (1.85 - 2.36)    | 2.39 (2.05 - 2.79)   | 2.39 (1.70 - 3.37)  |
| 40                | Fat Mass         | 1.57 (1.44 - 1.71)            | 1.49 (1.41 - 1.58)    | 1.68 (1.57 - 1.79)    | 1.81 (1.69 - 1.93)   | 2.34 (1.95 - 2.82)  |
|                   | Weight           | 1.64 (1.48 - 1.80)            | 1.64 (1.53 - 1.75)    | 1.91 (1.76 - 2.07)    | 2.14 (1.97 - 2.33)   | 2.90 (2.31 - 3.64)  |
| 50                | Fat Mass         | 1.45 (1.37 - 1.54)            | 1.45 (1.39 - 1.50)    | 1.54 (1.47 - 1.60)    | 1.62 (1.49 - 1.76)   |                     |
|                   | Weight           | 1.54 (1.43 - 1.65)            | 1.60 (1.52 - 1.68)    | 1.74 (1.65 - 1.84)    | 1.92 (1.74 - 2.12)   |                     |
| 60                | Fat Mass         | 1.34 (1.29 - 1.39)            | 1.40 (1.36 - 1.44)    | 1.41 (1.33 - 1.50)    |                      |                     |
|                   | Weight           | 1.45 (1.37 - 1.52)            | 1.56 (1.50 - 1.63)    | 1.59 (1.48 - 1.71)    |                      |                     |
| 70                | Fat Mass         | 1.24 (1.19 - 1.28)            | 1.36 (1.30 - 1.42)    |                       |                      |                     |
|                   | Weight           | 1.36 (1.29 - 1.43)            | 1.53 (1.45 - 1.61)    |                       |                      |                     |

FOOTNOTE: Hazard Ratios + 95% CIs (per-SD increase in adiposity marker) estimated from Cox proportional hazards models fitted within each of the five birth-cohort groups, adjusting for childhood height at age 13 years. SDs of adiposity markers at age 13 years were sex- and birth-cohort specific and can be found in Supplementary Table 1. Birth-cohort groups from 1950-59, 1960-69 and 1970-85 contain some empty cells as individuals within these groups were not yet old enough to provide estimates, without extrapolation, at these adult age

**eTable 7.** Adjusted Hazard Ratios (95% CI), Censored at 60 Years of Age, for Associations Between Fat Mass and Weight (per-Kilogram Increase) at Age 10 Years and Risk of Type 2 Diabetes (T2D) Between 30 and 60 Years, by Sex, Birth-Cohort Group and Overall

|                   |                  | Birth Cohort Group (N, cases) |                       |                       |                      |                      |                    |
|-------------------|------------------|-------------------------------|-----------------------|-----------------------|----------------------|----------------------|--------------------|
| Adult Age (years) | Adiposity marker | 1930-39 (29917, 1262)         | 1940-49 (43819, 2649) | 1950-59 (29143, 1991) | 1960-69 (19367, 684) | 1970-85 (13694, 119) | <i>Pooled</i>      |
| <b>Boys</b>       |                  |                               |                       |                       |                      |                      |                    |
| 30                | Fat Mass         | 1.12 (1.01 - 1.24)            | 1.16 (1.11 - 1.21)    | 1.19 (1.14 - 1.24)    | 1.21 (1.15 - 1.28)   | 1.20 (1.13 - 1.27)   | 1.18 (1.15 - 1.21) |
|                   | Weight           | 1.07 (1.01 - 1.12)            | 1.10 (1.07 - 1.12)    | 1.11 (1.08 - 1.14)    | 1.13 (1.10 - 1.17)   | 1.14 (1.09 - 1.18)   | 1.11 (1.09 - 1.13) |
| 40                | Fat Mass         | 1.10 (1.04 - 1.17)            | 1.14 (1.11 - 1.17)    | 1.16 (1.13 - 1.19)    | 1.17 (1.14 - 1.20)   | 1.19 (1.14 - 1.24)   | 1.16 (1.14 - 1.18) |
|                   | Weight           | 1.06 (1.03 - 1.10)            | 1.09 (1.07 - 1.11)    | 1.10 (1.08 - 1.12)    | 1.11 (1.10 - 1.13)   | 1.13 (1.10 - 1.17)   | 1.10 (1.08 - 1.12) |
| 50                | Fat Mass         | 1.09 (1.06 - 1.12)            | 1.12 (1.11 - 1.14)    | 1.14 (1.12 - 1.15)    | 1.14 (1.10 - 1.17)   |                      | 1.12 (1.11 - 1.14) |
|                   | Weight           | 1.06 (1.03 - 1.08)            | 1.08 (1.07 - 1.09)    | 1.09 (1.08 - 1.10)    | 1.09 (1.07 - 1.12)   |                      | 1.08 (1.07 - 1.09) |
| 60                | Fat Mass         | 1.07 (1.02 - 1.13)            | 1.11 (1.08 - 1.14)    | 1.11 (1.08 - 1.14)    |                      |                      | 1.11 (1.09 - 1.12) |
|                   | Weight           | 1.05 (1.02 - 1.08)            | 1.07 (1.06 - 1.09)    | 1.08 (1.06 - 1.10)    |                      |                      | 1.07 (1.06 - 1.09) |
| <b>Girls</b>      |                  |                               |                       |                       |                      |                      |                    |
|                   |                  | 1930-39 (29186, 661)          | 1940-49 (43383, 1505) | 1950-59 (28495, 1235) | 1960-69 (19292, 492) | 1970-85 (13617, 104) | <i>Pooled</i>      |
| 30                | Fat Mass         | 1.13 (1.01 - 1.25)            | 1.13 (1.08 - 1.18)    | 1.19 (1.14 - 1.24)    | 1.24 (1.18 - 1.30)   | 1.29 (1.22 - 1.37)   | 1.20 (1.14 - 1.26) |
|                   | Weight           | 1.08 (1.01 - 1.15)            | 1.09 (1.06 - 1.12)    | 1.12 (1.09 - 1.15)    | 1.16 (1.12 - 1.19)   | 1.20 (1.15 - 1.25)   | 1.13 (1.09 - 1.17) |
| 40                | Fat Mass         | 1.13 (1.06 - 1.21)            | 1.14 (1.11 - 1.17)    | 1.17 (1.14 - 1.20)    | 1.22 (1.19 - 1.25)   | 1.28 (1.22 - 1.35)   | 1.19 (1.14 - 1.23) |
|                   | Weight           | 1.09 (1.05 - 1.13)            | 1.10 (1.08 - 1.11)    | 1.11 (1.09 - 1.13)    | 1.14 (1.12 - 1.17)   | 1.20 (1.15 - 1.24)   | 1.13 (1.10 - 1.15) |
| 50                | Fat Mass         | 1.14 (1.11 - 1.18)            | 1.16 (1.14 - 1.18)    | 1.15 (1.13 - 1.17)    | 1.19 (1.15 - 1.23)   |                      | 1.16 (1.14 - 1.17) |
|                   | Weight           | 1.09 (1.07 - 1.12)            | 1.10 (1.09 - 1.12)    | 1.10 (1.09 - 1.11)    | 1.13 (1.11 - 1.16)   |                      | 1.11 (1.09 - 1.12) |
| 60                | Fat Mass         | 1.15 (1.09 - 1.21)            | 1.17 (1.14 - 1.20)    | 1.13 (1.10 - 1.16)    |                      |                      | 1.15 (1.12 - 1.18) |
|                   | Weight           | 1.10 (1.07 - 1.13)            | 1.11 (1.10 - 1.13)    | 1.09 (1.07 - 1.11)    |                      |                      | 1.10 (1.08 - 1.12) |

FOOTNOTE: Survival estimates were censored at 60 years of age. Hazard Ratios + 95% CIs estimated from Cox proportional hazards models fitted within each of the five birth cohort groups, adjusting for childhood height at age 10 years. The resulting estimates were averaged using a random-effects meta-analysis approach to provide an overall estimate of the effect of fat mass and weight on T2D risk in adulthood. Birth cohort groups from 1950-59, 1960-69 and 1970-85 contain some empty cells as individuals within these groups were not yet old enough to provide estimates, without extrapolation, at these adult ages.



**eTable 8.** Adjusted Hazard Ratios (95% CI), Censored at 60 Years of Age, for Associations Between Fat Mass and Weight (per-Kilogram Increase) at Age 13 Years and Risk of Type 2 Diabetes (T2D) Between 30 and 60 Years, by Sex, Birth-Cohort Group and Overall

|                   |                  | Birth Cohort Group (N, cases) |                       |                       |                      |                     |                    |
|-------------------|------------------|-------------------------------|-----------------------|-----------------------|----------------------|---------------------|--------------------|
| Adult Age (years) | Adiposity marker | 1930-39 (28755, 1207)         | 1940-49 (43548, 2627) | 1950-59 (28935, 1975) | 1960-69 (19304, 686) | 1970-85 (10483, 97) | <i>Pooled</i>      |
| <b>Boys</b>       |                  |                               |                       |                       |                      |                     |                    |
| 30                | Fat Mass         | 1.12 (1.06 - 1.19)            | 1.10 (1.08 - 1.13)    | 1.14 (1.11 - 1.17)    | 1.14 (1.10 - 1.18)   | 1.09 (1.04 - 1.14)  | 1.12 (1.10 - 1.14) |
|                   | Weight           | 1.06 (1.03 - 1.09)            | 1.07 (1.05 - 1.08)    | 1.08 (1.06 - 1.09)    | 1.09 (1.07 - 1.11)   | 1.07 (1.04 - 1.10)  | 1.07 (1.07 - 1.08) |
| 40                | Fat Mass         | 1.11 (1.07 - 1.15)            | 1.10 (1.08 - 1.12)    | 1.12 (1.10 - 1.14)    | 1.12 (1.10 - 1.14)   | 1.13 (1.09 - 1.16)  | 1.12 (1.11 - 1.13) |
|                   | Weight           | 1.06 (1.04 - 1.08)            | 1.07 (1.06 - 1.08)    | 1.07 (1.06 - 1.08)    | 1.08 (1.07 - 1.09)   | 1.08 (1.06 - 1.11)  | 1.07 (1.07 - 1.08) |
| 50                | Fat Mass         | 1.09 (1.07 - 1.11)            | 1.10 (1.09 - 1.11)    | 1.11 (1.09 - 1.12)    | 1.11 (1.08 - 1.13)   |                     | 1.10 (1.10 - 1.11) |
|                   | Weight           | 1.06 (1.05 - 1.07)            | 1.07 (1.06 - 1.07)    | 1.07 (1.06 - 1.08)    | 1.07 (1.06 - 1.09)   |                     | 1.07 (1.06 - 1.07) |
| 60                | Fat Mass         | 1.08 (1.05 - 1.11)            | 1.10 (1.08 - 1.12)    | 1.09 (1.07 - 1.11)    |                      |                     | 1.09 (1.08 - 1.10) |
|                   | Weight           | 1.06 (1.04 - 1.08)            | 1.07 (1.06 - 1.08)    | 1.07 (1.06 - 1.08)    |                      |                     | 1.06 (1.06 - 1.07) |
| <b>Girls</b>      |                  |                               |                       |                       |                      |                     |                    |
|                   |                  | 1930-39 (29070, 653)          | 1940-49 (43189, 1496) | 1950-59 (28421, 1232) | 1960-69 (19267, 496) | 1970-85 (10220, 65) | <i>Pooled</i>      |
| 30                | Fat Mass         | 1.09 (1.02 - 1.17)            | 1.06 (1.03 - 1.10)    | 1.14 (1.11 - 1.17)    | 1.17 (1.14 - 1.20)   | 1.13 (1.07 - 1.19)  | 1.12 (1.08 - 1.17) |
|                   | Weight           | 1.05 (1.02 - 1.09)            | 1.05 (1.03 - 1.06)    | 1.09 (1.07 - 1.11)    | 1.11 (1.09 - 1.13)   | 1.09 (1.06 - 1.13)  | 1.08 (1.05 - 1.11) |
| 40                | Fat Mass         | 1.10 (1.06 - 1.15)            | 1.08 (1.07 - 1.10)    | 1.13 (1.11 - 1.14)    | 1.14 (1.12 - 1.16)   | 1.17 (1.13 - 1.21)  | 1.12 (1.10 - 1.15) |
|                   | Weight           | 1.07 (1.04 - 1.09)            | 1.06 (1.05 - 1.07)    | 1.08 (1.07 - 1.09)    | 1.10 (1.08 - 1.11)   | 1.11 (1.09 - 1.14)  | 1.08 (1.07 - 1.10) |
| 50                | Fat Mass         | 1.11 (1.09 - 1.14)            | 1.11 (1.09 - 1.12)    | 1.11 (1.10 - 1.12)    | 1.11 (1.09 - 1.13)   |                     | 1.11 (1.10 - 1.12) |
|                   | Weight           | 1.08 (1.06 - 1.09)            | 1.07 (1.06 - 1.08)    | 1.07 (1.07 - 1.08)    | 1.08 (1.07 - 1.09)   |                     | 1.07 (1.07 - 1.08) |
| 60                | Fat Mass         | 1.13 (1.09 - 1.16)            | 1.13 (1.11 - 1.15)    | 1.09 (1.07 - 1.11)    |                      |                     | 1.11 (1.09 - 1.14) |
|                   | Weight           | 1.09 (1.07 - 1.11)            | 1.09 (1.08 - 1.10)    | 1.06 (1.05 - 1.08)    |                      |                     | 1.08 (1.06 - 1.10) |

FOOTNOTE: Survival estimates were censored at 60 years of age. Hazard Ratios + 95% CIs estimated from Cox proportional hazards models fitted within each of the five birth cohort groups, adjusting for childhood height at age 13 years. The resulting estimates were averaged using a random-effects meta-analysis approach to provide an overall estimate of the effect of fat mass and weight on T2D risk in adulthood. Birth cohort groups from 1950-59, 1960-69 and 1970-85 contain some empty cells as individuals within these groups were not yet old enough to provide estimates, without extrapolation, at these adult ages

**eFigure.** Flowchart of Available Participants and Exclusions Made in This Study

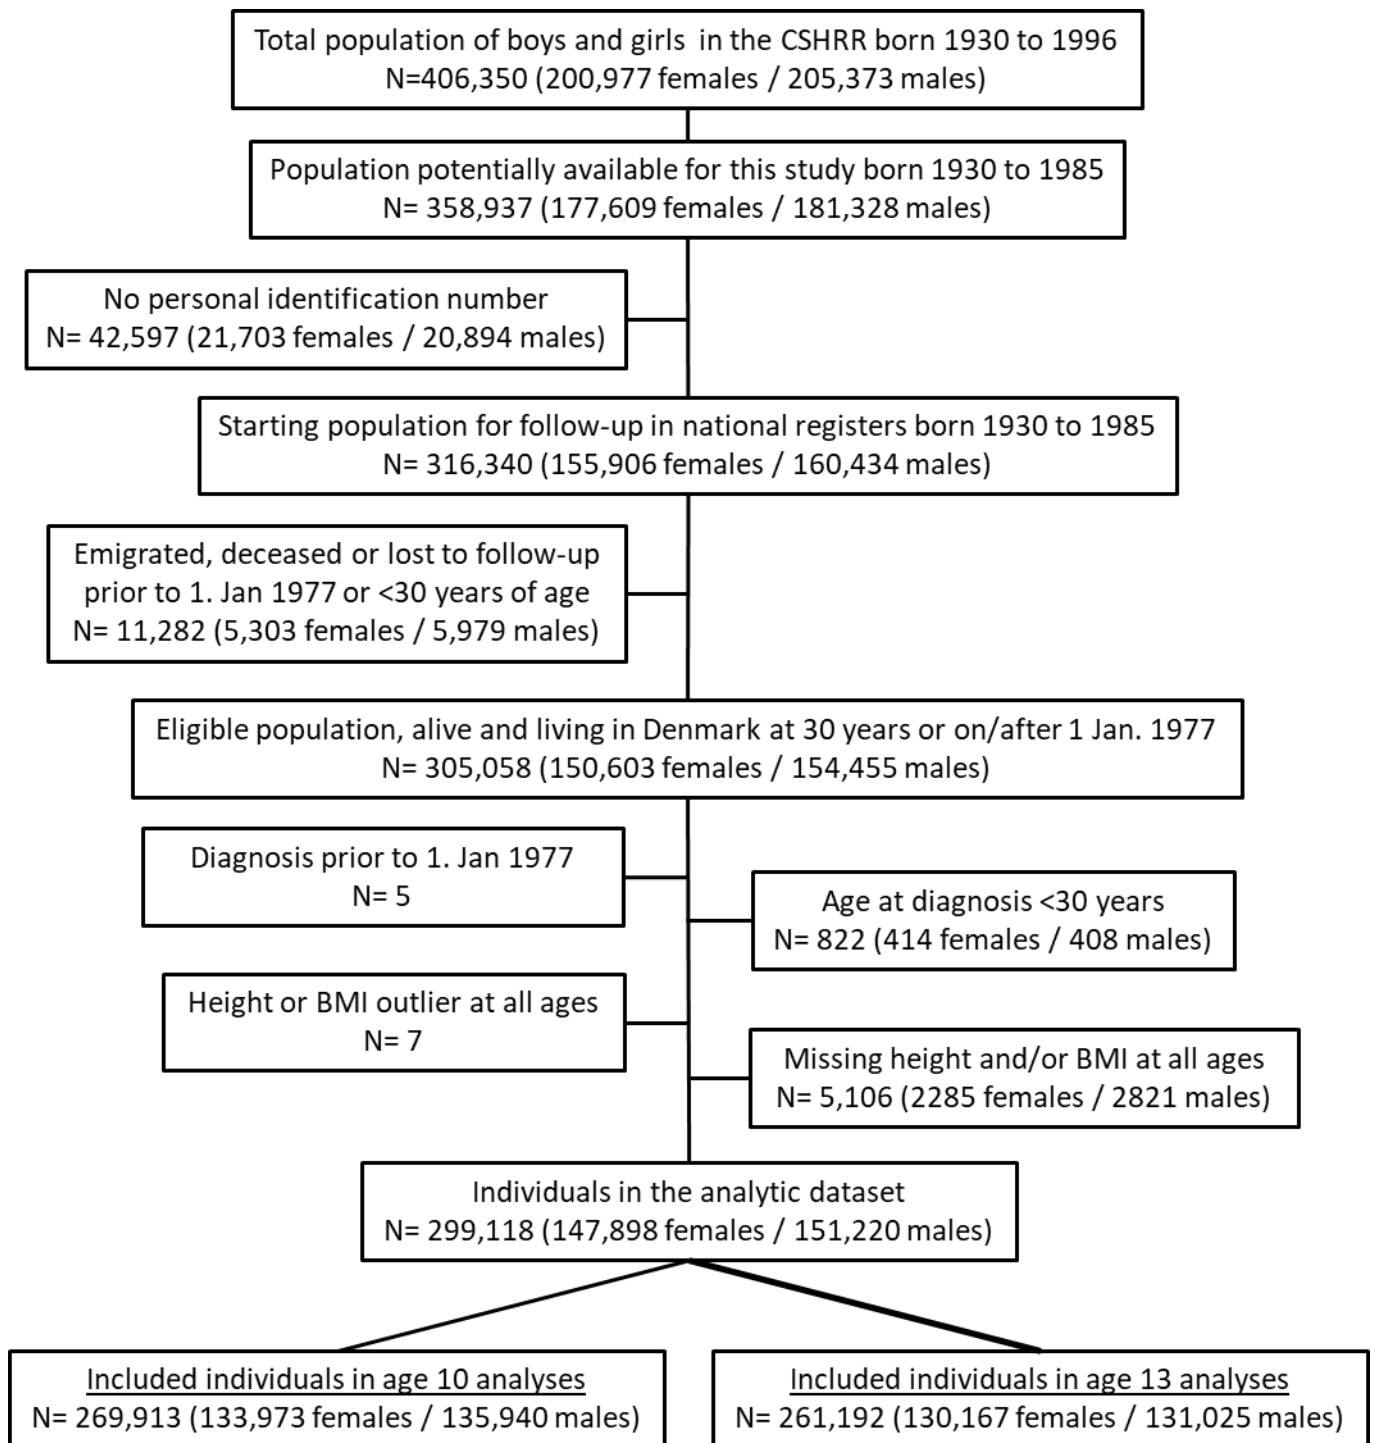

Supplement: jamanetwopen-e218524-s001.pdf [file jamanetwopen-e218524-s001.pdf]
